# Supplementary material for: Merging of memory effect and anion intercalation: MnOx-decorated MgAl-LDO as a high-performance nano-adsorbent for the removal of methyl orange
Source: Royal Society of Chemistry journal article supplement (doi:10.1039/c6dt00335d), 2016-01-01
Supplement: c6dt00335d1.pdf [file c6dt00335d1.pdf]

**Table S1** Elemental analysis of as-prepared M-LDO sample in this work.

| Sample | Mg (wt %) | Al (wt %) | Mg/Al molar ratio | Mn (wt %) |
|--------|-----------|-----------|-------------------|-----------|
| M-LDO  | 31.39     | 19.68     | 1.79              | 1.36      |

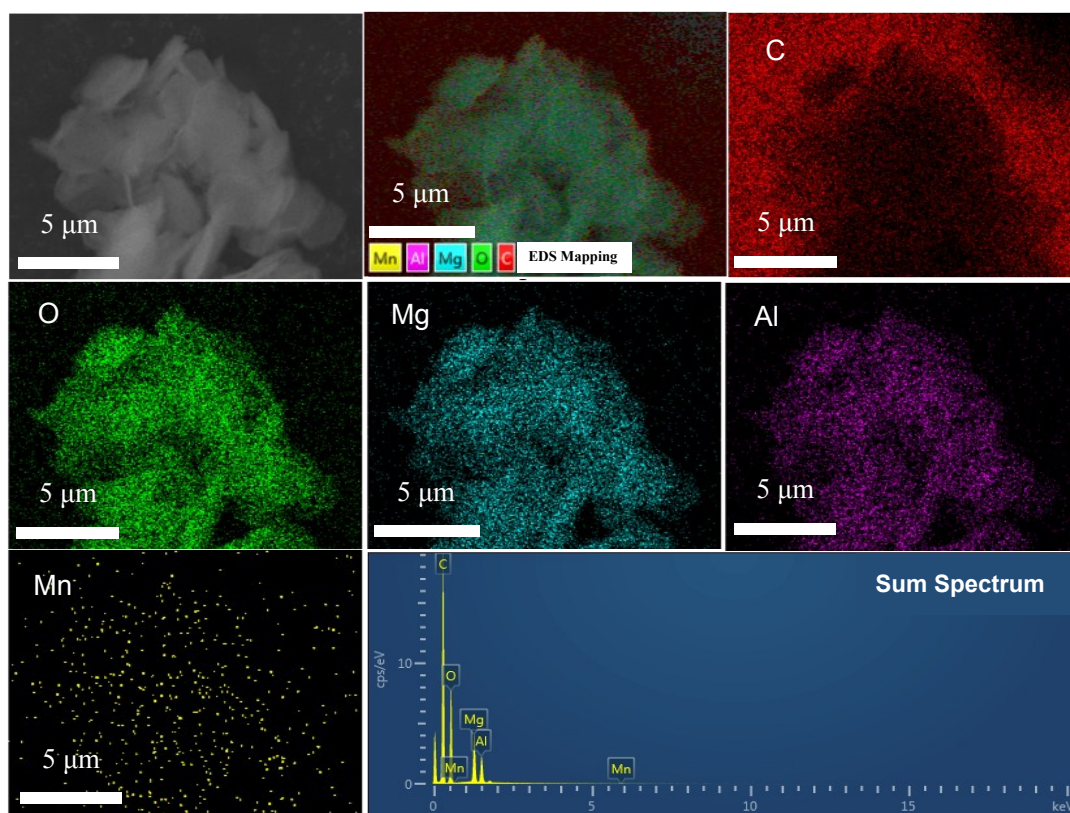

**Fig. S1** Energy Dispersive X-ray (EDX) spectrum of M-LDH.

Note that a mass of C element was because of the use of conductive adhesive for SEM characterization.

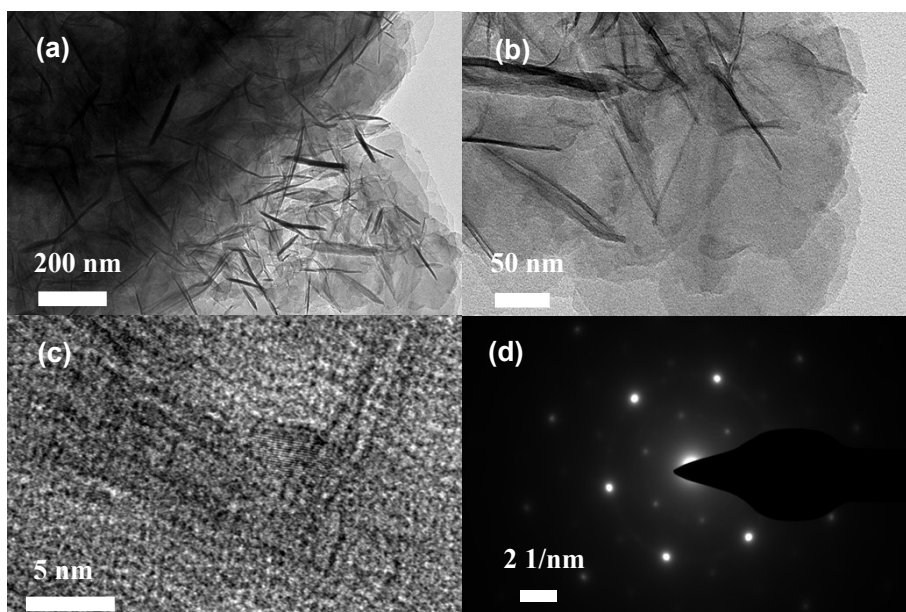

**Fig. S2** (a, b) low and (c) high magnification TEM images of M-LDH nanocomposites and the corresponding SAED patterns (d).

**Table S2** Lattice parameters of as-obtained materials in this work.

| Sample | Lattice parameter |               |         |         |
|--------|-------------------|---------------|---------|---------|
|        | $d_{003}$ (Å)     | $d_{110}$ (Å) | $a$ (Å) | $c$ (Å) |
| LDH    | 7.4614            | 1.5153        | 3.0306  | 22.3842 |
| M-LDH  | 7.6644            | 1.5234        | 3.0468  | 22.9932 |

Note:  $d_{003}$  and  $d_{110}$  represent the interlayer distance and the average metal-metal distance in the brucite-like layer, respectively. And  $a = 2 d_{110}$ ,  $c = 3 d_{003}$ .

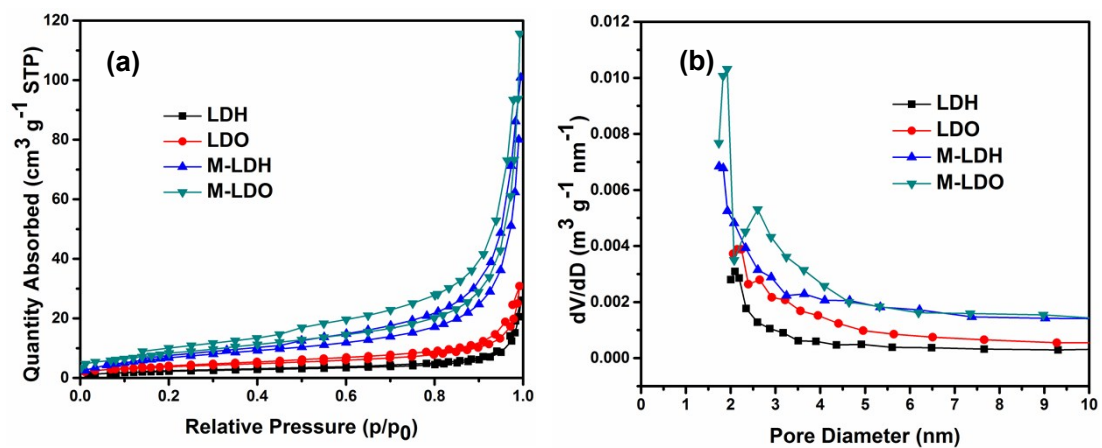

**Fig. S3** Comparison of (a) N<sub>2</sub>-sorption isotherms and (b) pore-size distribution of the samples as-prepared in this work.

**Table S3** Removal of MO, BET surface area and average pore size of the as-prepared samples in this study.

| Sample | Removal of MO (%) | BET surface area (m <sup>2</sup> g <sup>-1</sup> ) | Average pore size (nm) |
|--------|-------------------|----------------------------------------------------|------------------------|
| LDH    | 41.73             | 8.4616                                             | 9.0738                 |
| LDO    | 51.56             | 13.7174                                            | 7.7690                 |
| M-LDH  | 53.18             | 27.0836                                            | 11.6723                |
| M-LDO  | 97.93             | 31.5640                                            | 11.9708                |

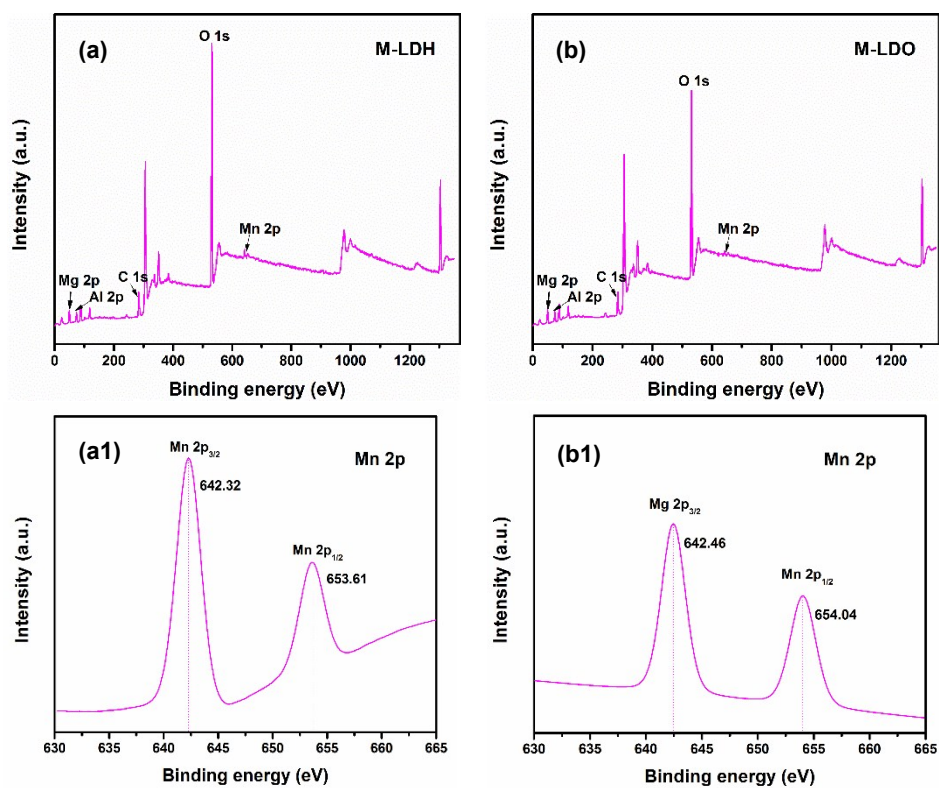

**Fig. S4** (a) The survey XPS spectrum and high-resolution Mn 2p (a1) of M-LDH; (b) The survey XPS spectrum and high-resolution Mn 2p (b1) of M-LDO.

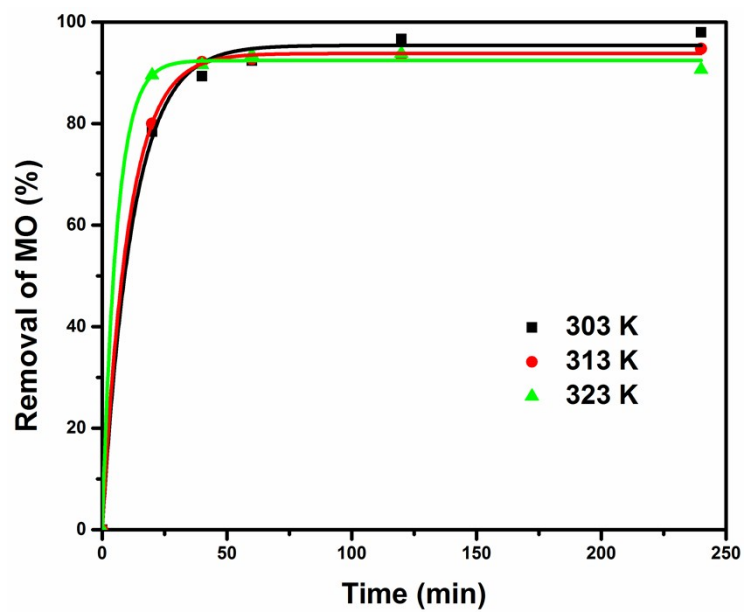

**Fig. S5** Effect of adsorption temperature (303 K, 313 K, 323 K). (conditions: dosage of adsorbent: 10 mg, initial concentration of adsorbate: 10 mg L<sup>-1</sup>).



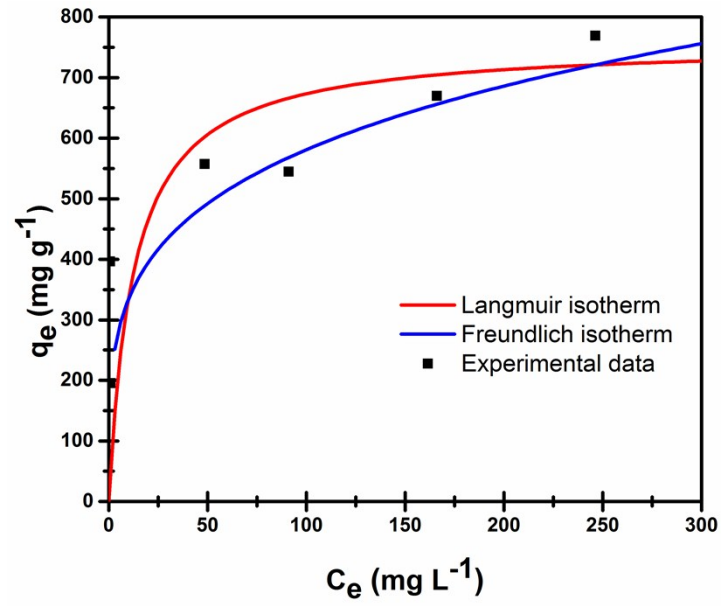

**Fig. S6** The contrast of experimental data and predicted isotherm models investigated.

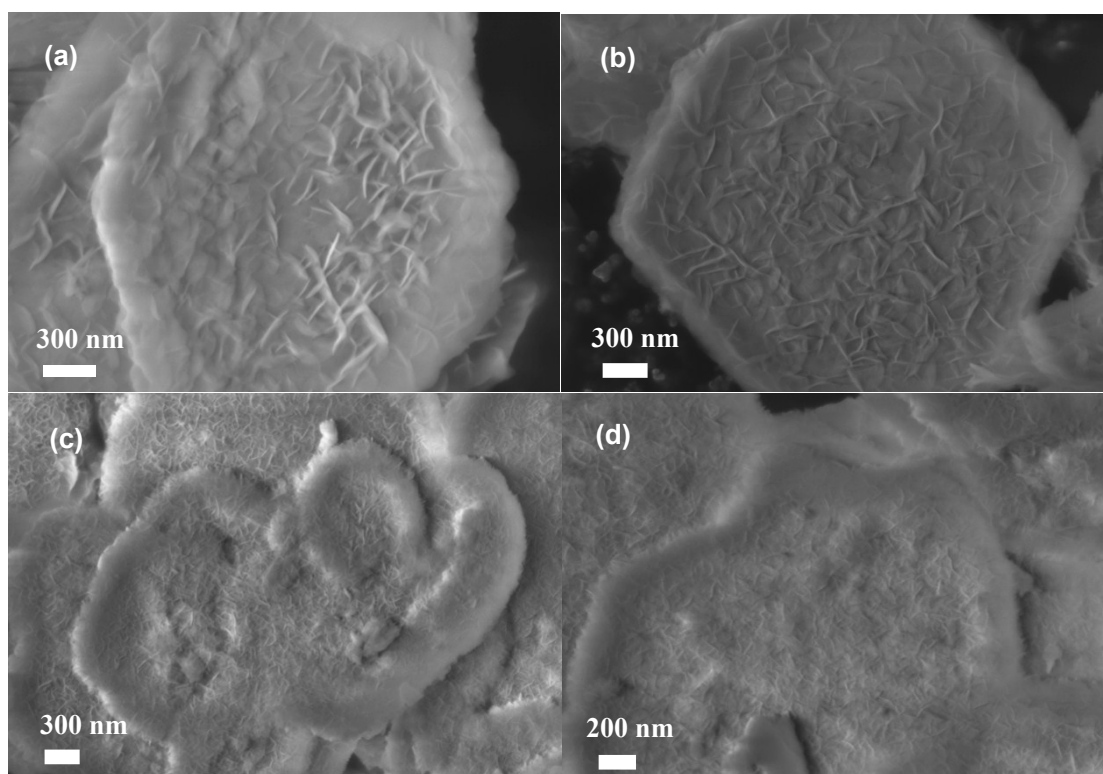

**Fig. S7** SEM images of used adsorbents: (a) after the first time adsorption of MO and (b) calcined at 773 K for 1 h (R0); (c, d) the same process after the fifth thermal regeneration (R5).
